# Supplementary material for: iTRAQ-Based Quantitative Proteomics Unveils Protein Dynamics in the Root of Solanum melongena L. under Waterlogging Stress Conditions
Source: MDPI journal article supplement (doi:10.3390/life13061399), 2023-06-15
Supplement: s1 [file s1]

**Table S4.** Sequences of primer pairs were used in this study.

| Primer name      | Forward (5' to 3')       | Reserves (5' to 3')      |         |
|------------------|--------------------------|--------------------------|---------|
| <i>SmFUT1</i>    | AGGCTTTGCATTCATTTTGG     | CGATAGGCCTGTTCAAGCTC     | RT-qPCR |
| <i>SmFKBP42</i>  | GATTGGGGCAGCAGATAGAA     | TCCCGGAACTTACCAAACAG     | RT-qPCR |
| <i>SmSNARE13</i> | AAGCCGGGACAAGATTCAT      | TCCACGAATAGCATTCTCTG     | RT-qPCR |
| <i>SmSRT2</i>    | CCGGCTTATCAAAGCTGCTA     | CTCTCCAACTCGAGCACTGA     | RT-qPCR |
| <i>SmUVR8</i>    | CCCATCACCAGCTGAAAAAT     | TTTCCGGCACATTACATCA      | RT-qPCR |
| <i>SmActin</i>   | CACTTAGCACCTTCCAGCAGATGT | GTACAACAGCAGACCTGAGTTCCT | RT-qPCR |
