# Supplementary figures and images for: iTRAQ-Based Quantitative Proteomics Unveils Protein Dynamics in the Root of Solanum melongena L. under Waterlogging Stress Conditions
Source: MDPI journal article supplement (doi:10.3390/life13061399), 2023-06-15

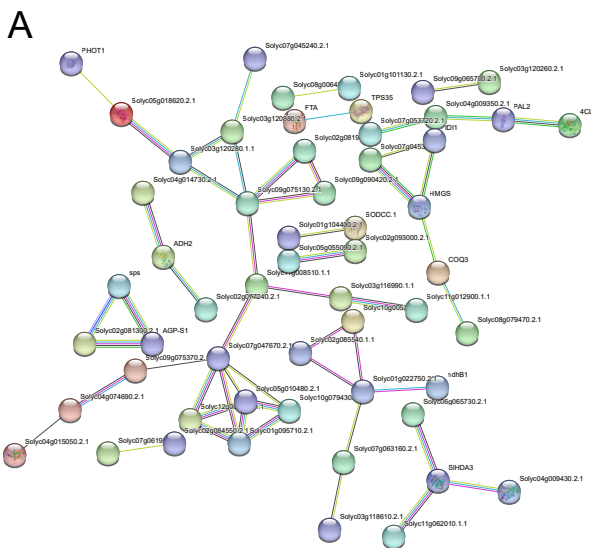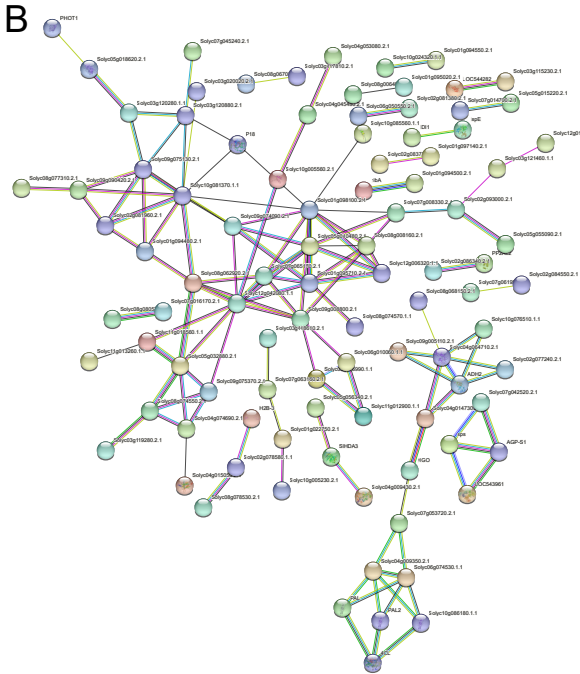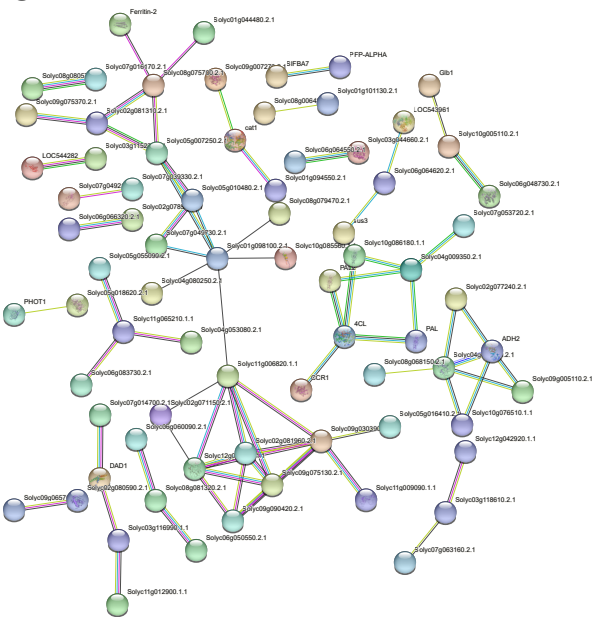

Supplement: s1 [file s1]

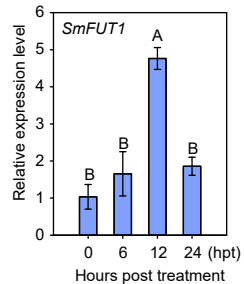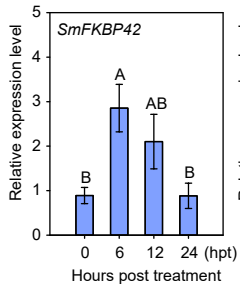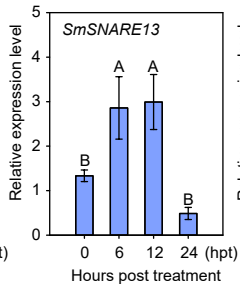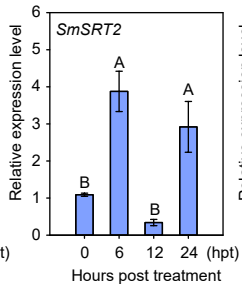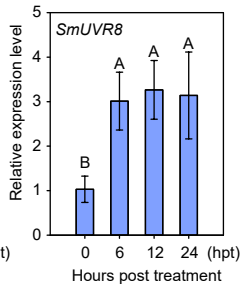

Supplement: s1 [file s1]
